# Supplementary material for: Directed synthesis of aragonite through semi-continuous seeded crystallization methods for CO2 utilization
Source: Royal Society of Chemistry journal article supplement (doi:10.1039/d3ce00809f), 2023-01-01
Supplement: d3ce00809f1.pdf [file d3ce00809f1.pdf]

## Supplementary Information

# Directed synthesis of aragonite through semi-continuous seeded crystallization methods for CO<sub>2</sub> utilization

Jonah M. Williams<sup>1,2</sup>, Diandian Zhao<sup>2,3</sup>, Ning Zhang<sup>1,2</sup>, Aysha Chin<sup>4</sup>, Shiho Kawashima<sup>2,3</sup>, and Aaron J. Moment<sup>2,5,§</sup>

<sup>1</sup>Department of Earth and Environmental Engineering, Columbia University, New York, New York, 10027

<sup>2</sup>Lenfest Center for Sustainable Energy, Columbia University, New York, New York, 10027

<sup>3</sup>Department of Civil Engineering and Engineering Mechanics, Columbia University, New York, New York, 10027

<sup>4</sup>Department of Chemical Engineering, Rochester Institute of Technology, Rochester, New York, 14623

<sup>5</sup>Department of Chemical Engineering, Columbia University, New York, New York, 10027

**§ajm2293@columbia.edu**

**S1: Leaching and pH-swing process of the waste hydrated cement paste (HCP)**

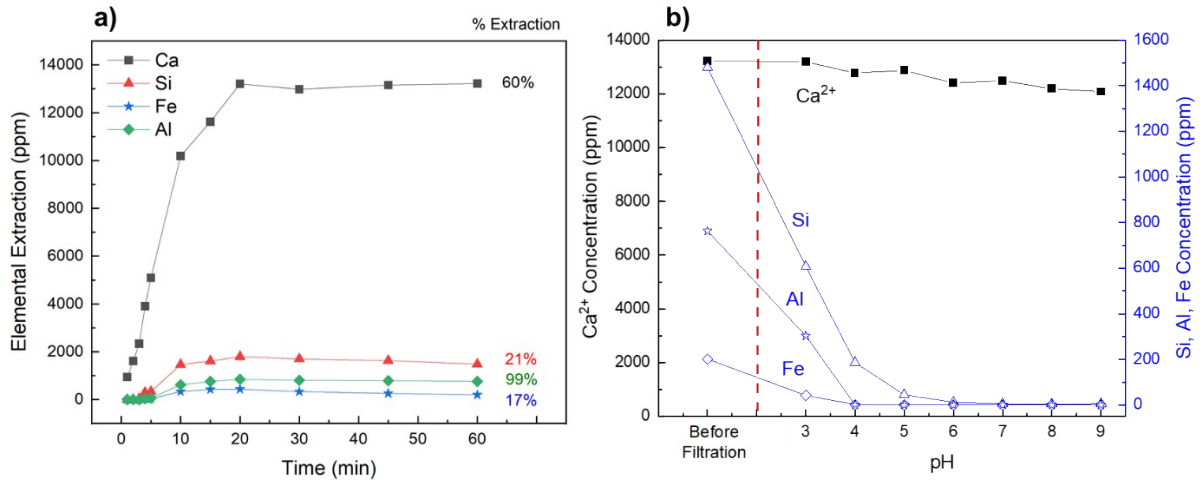

**Figure S1. (a)** Leaching kinetics at pH 3 of waste hydrated cement paste (HCP) over the course of 60 minutes showing the concentration of Ca, Si, Fe, and Al. **(b)** pH-swing process (pH 3 to 9) kinetics to remove the ancillary ions, Si, Fe, and Al from the reaction liquor prior to carbonation. Concentrations were verified using ICP-OES.<sup>1,2</sup>

## S2: CO<sub>2</sub>-loading into aqueous carbonate salts of potassium using KOH

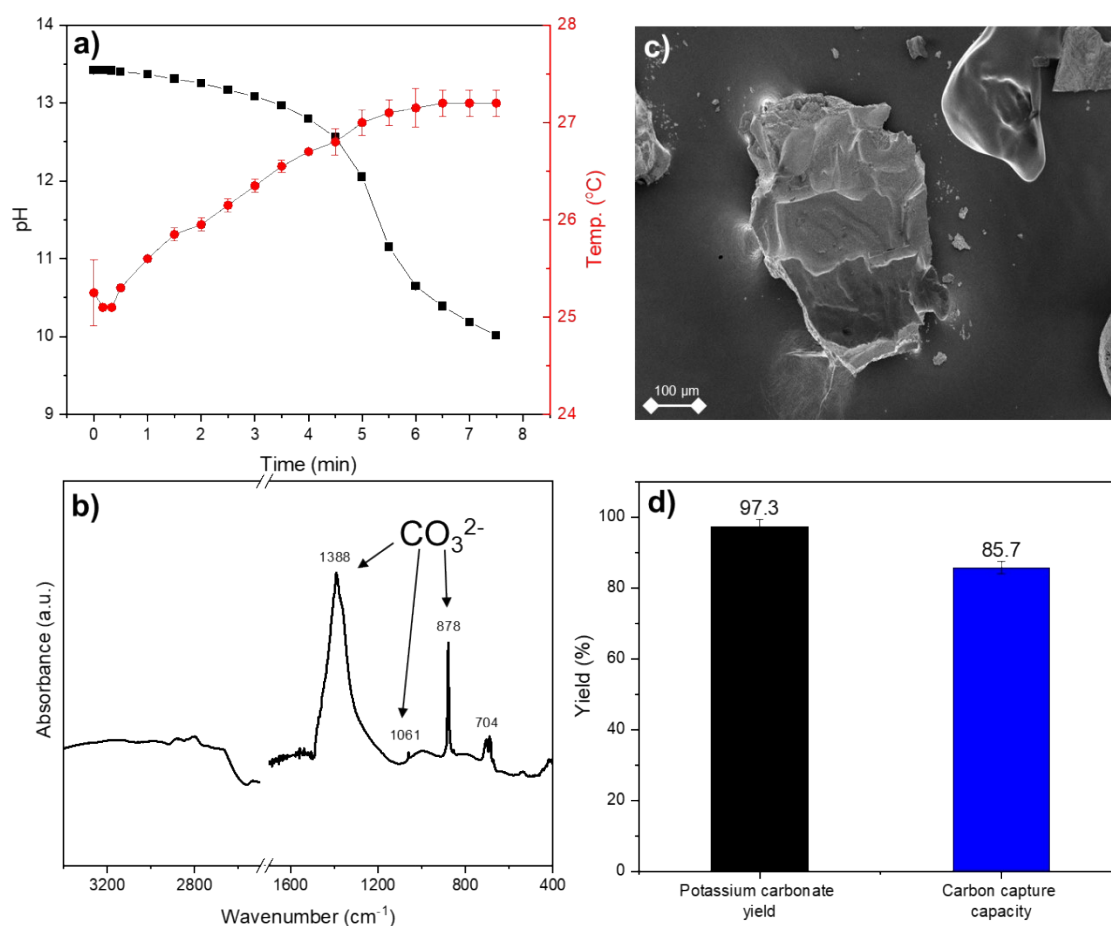

**Figure S2.** (a) pH and temperature kinetics for the carbonation of aqueous KOH. (b) FTIR spectral data confirming the appearance of carbonate peaks linked to K<sub>2</sub>CO<sub>3</sub> in the solid sample and (c) SEM image of the produced solid. (d) % yield of potassium carbonate and carbon capture capacity based on the stoichiometry of the reaction and CO<sub>2</sub>-flow, respectively.

**S3:** Visualization of the semi-continuous crystallization apparatus

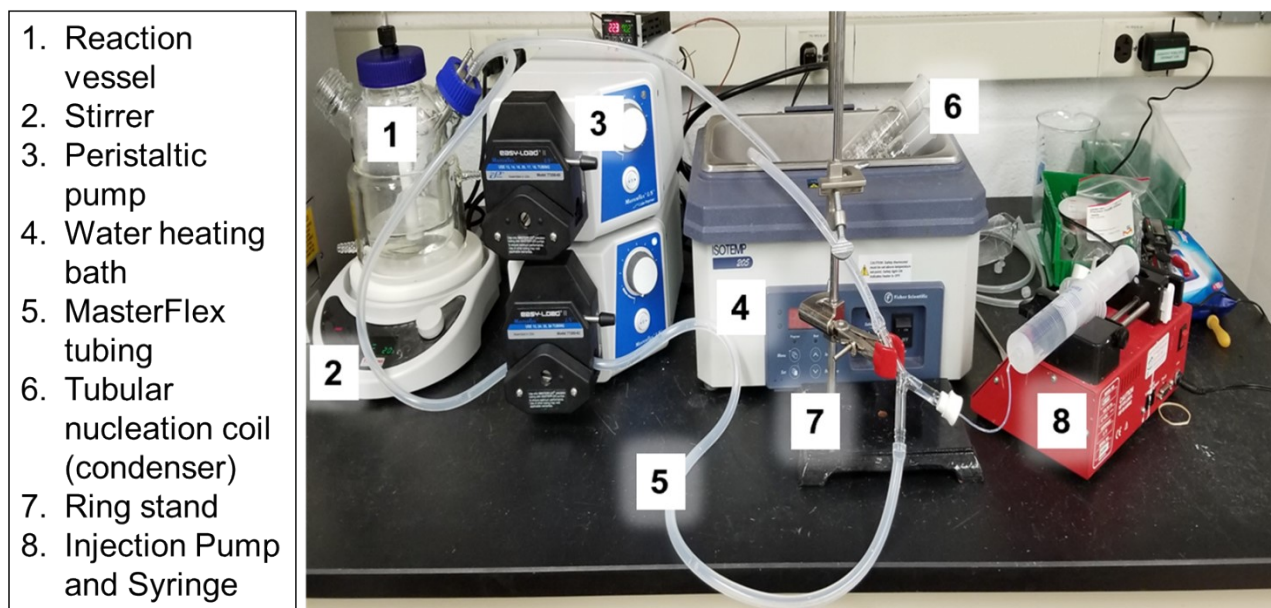

**Figure S3.** Semi-continuous crystallization apparatus which includes a 500 mL ChemGlass reaction vessel, peristaltic circulation pump, a heating bath and tubular nucleation coil (Graham condenser), and syringe pump for calcium injection.

**S4: Calibration and flow properties of the semi-continuous crystallization reactor**

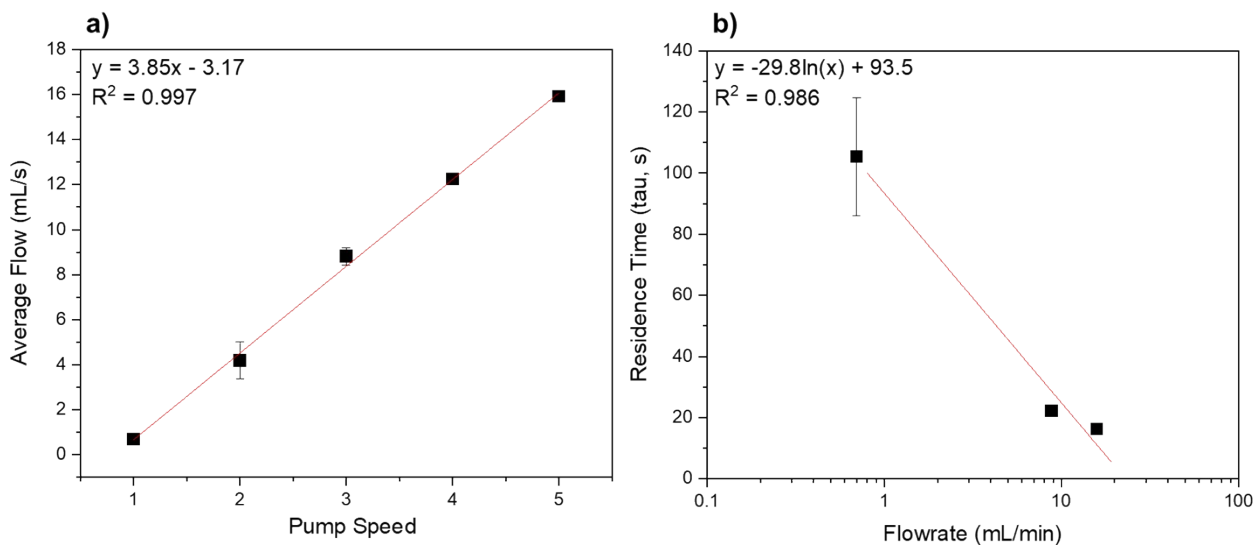

**Figure S4. (a)** Calibration of the circulation pump controller speed to circulation flow rate and **(b)** correlation of residence time versus semi-continuous crystallizer circulation rate as confirmed by dye-tracer tests.

**S5: Additional characteristics and properties of the produced PCC crystal seeds**

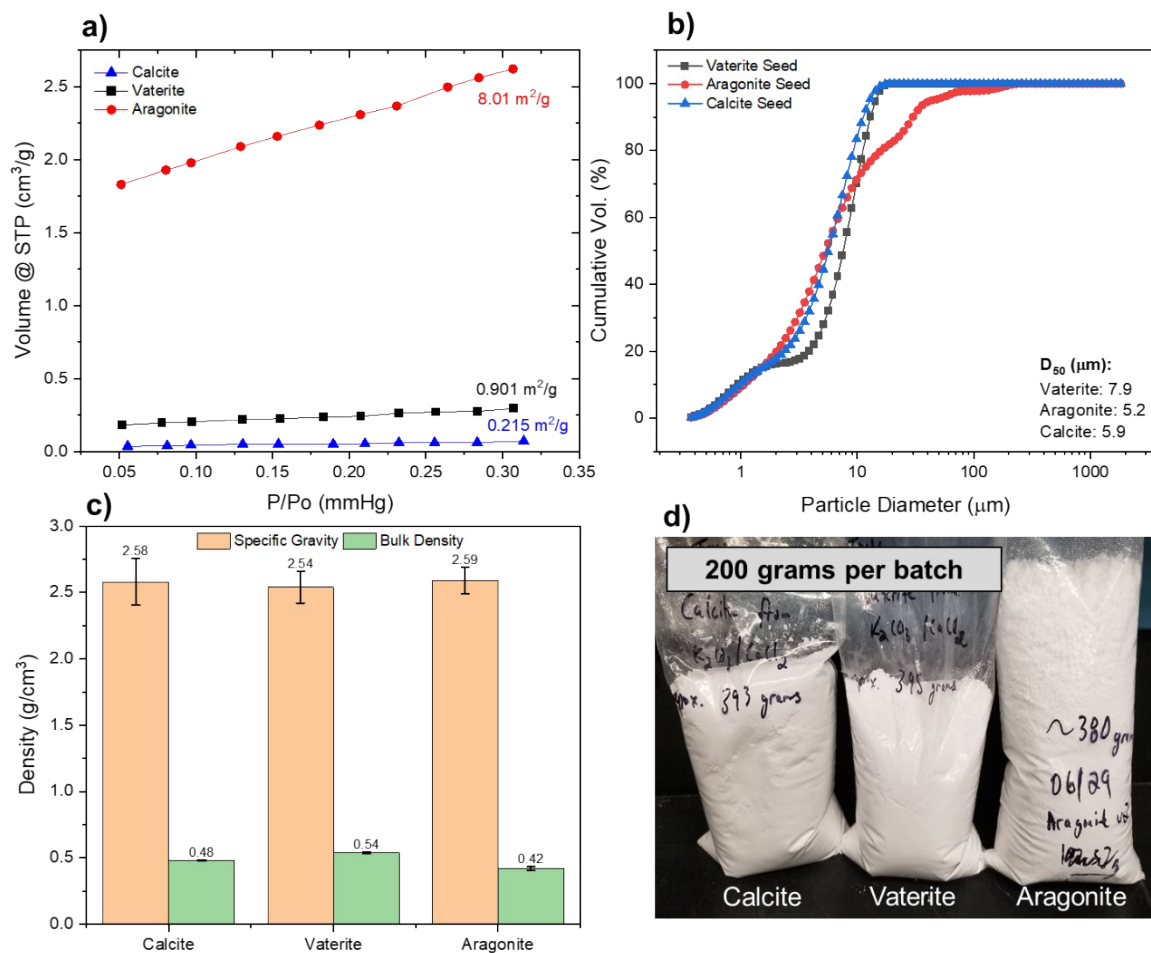

**Figure S5.** (a) BET surface area, (b) particle size distributions, (c) measured bulk and specific gravities, and (d) optically visual differences in bulk densities for scaled-up batches.

S6: SEM images of the PCC produced by un-seeded *batch* crystallization at various temperatures

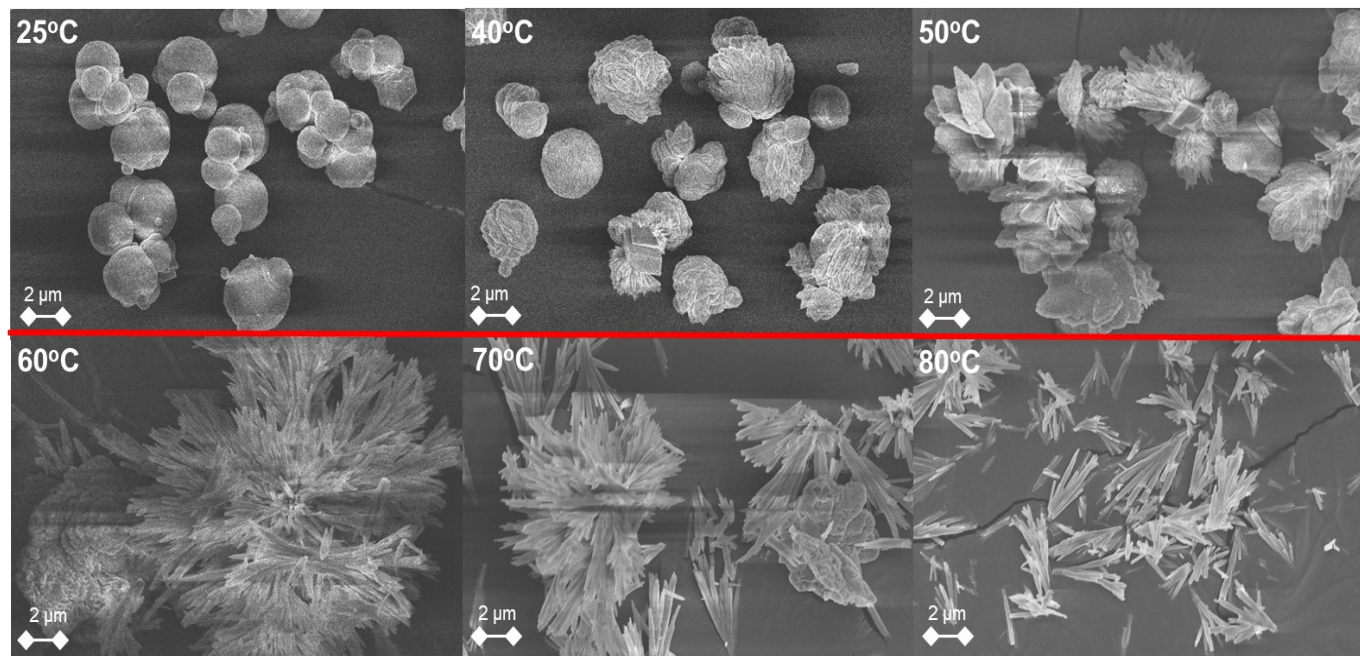

**Figure S6.** SEM images of the produced PCC at 25, 40, 50, 60, 70 and 80°C (from left to right) using the un-seeded batch crystallizer.



S7: SEM images of the PCC produced by un-seeded *semi-continuous* crystallization at various temperatures

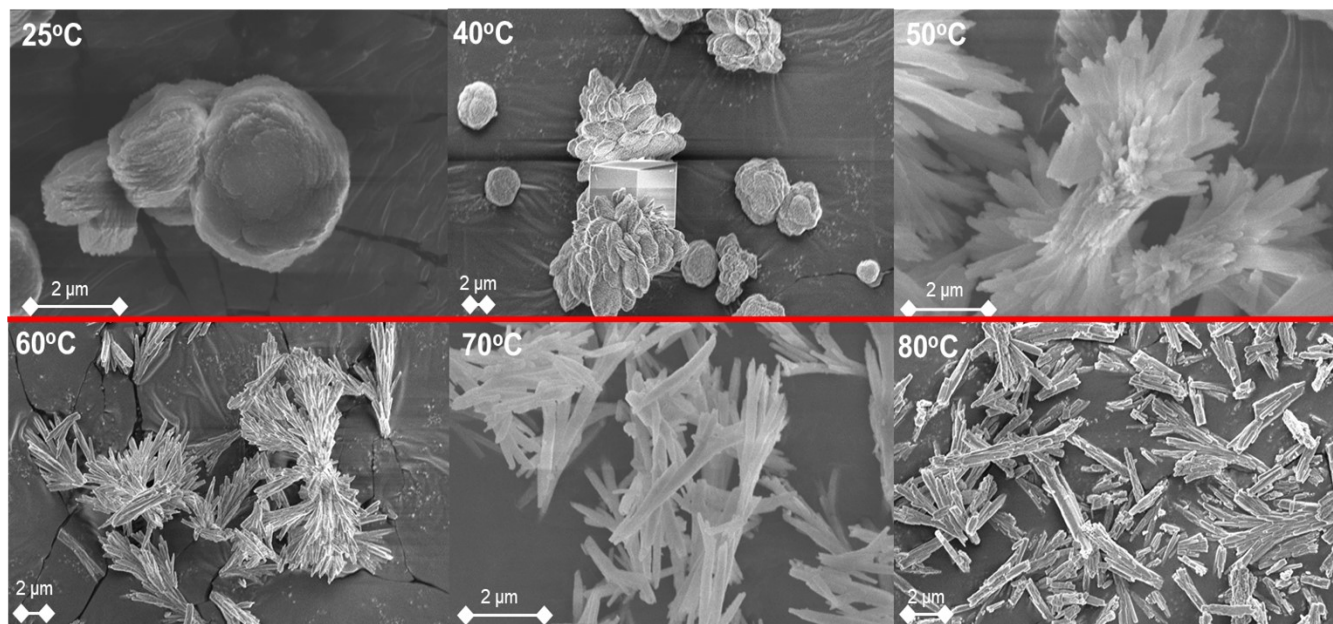

**Figure S7.** SEM images of the produced PCC at 25, 40, 50, 60, 70 and 80°C (from left to right) using the un-seeded semi-continuous crystallizer.



**S8:** Aragonite seeded temperature FTIR data for batch and semi-continuous crystallizer operation

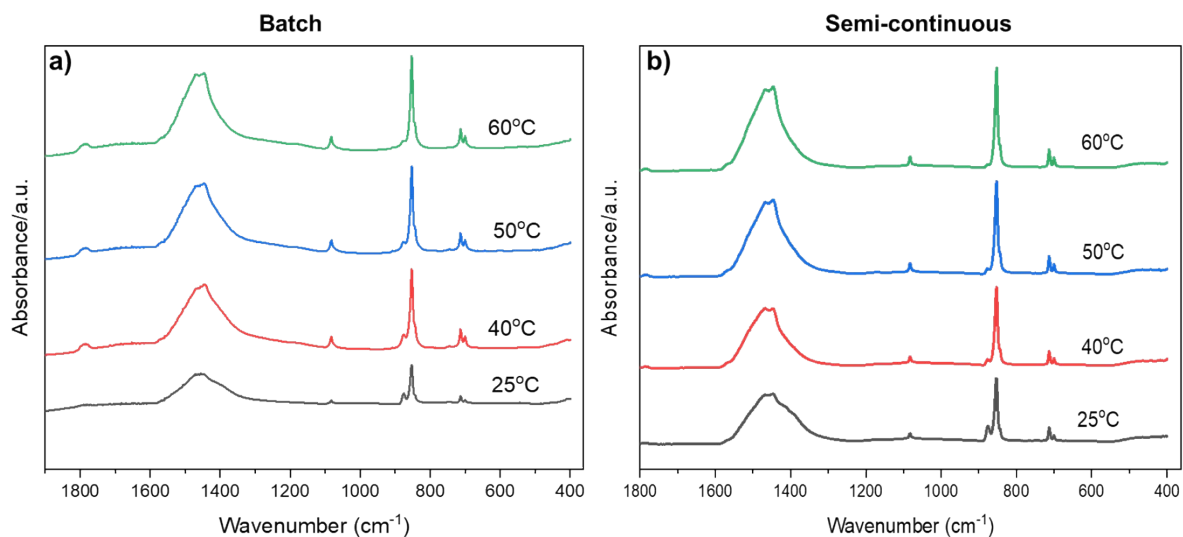

**Figure S8.** FTIR data for the PCC samples produced using aragonite seeding in (a) batch and (b) semi-continuous crystallization modes. 1 wt.% seed load of aragonite was used in all cases.

**S9:** SEM images showing the effect of seed load on aragonite crystallization at ambient conditions

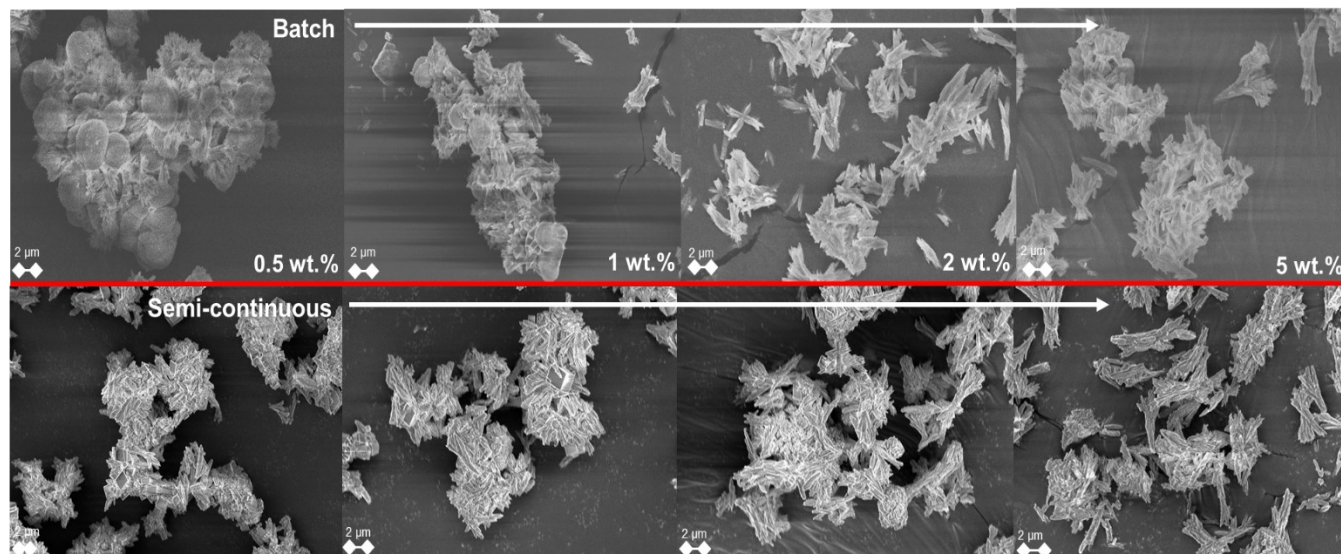

**Figure S9.** SEM images of the PCC produced at ambient conditions (25°C) by varying the seed load from 0.5 to 5 wt.% slurry density.

**S10:** FTIR data for batch and semi-continuous crystallizer aragonite seeding at ambient conditions

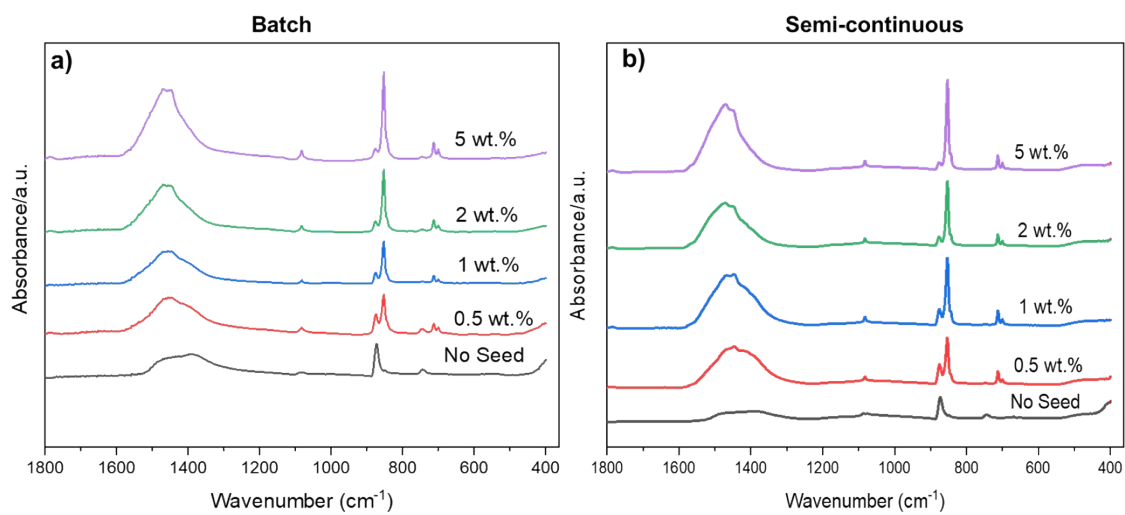

**Figure S10.** (a) Batch and (b) semi-continuous seeded production of aragonite at ambient conditions (25°C) by varying the seed load from 0.5 to 5 wt. % slurry density.

**S11:** PCC carbonate purity from Ca-leachate from waste cement paste at pH 3 and pH 9

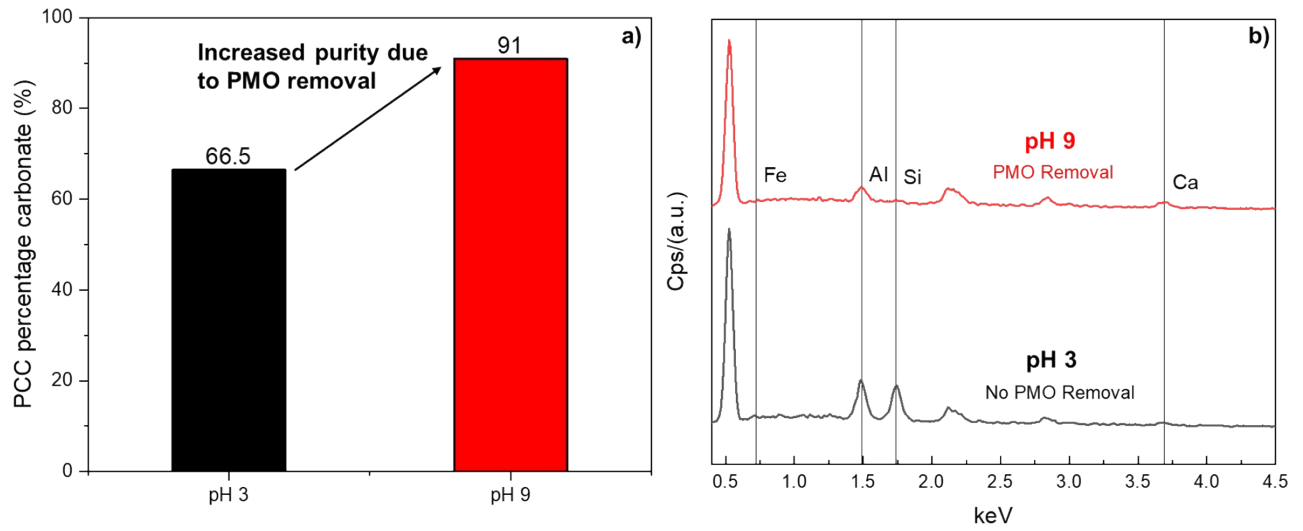

**Figure S11.** (a) Carbonate product purity as determined by coulometric carbon analysis for pH 3 PCC and pH 9 PCC. (b) EDS measurements of pH 3 PCC and pH 9 PCC showcasing the removal of certain ancillary ions such as Fe, Al, and Si.

**References:**

- 1 G. Rim, N. Roy, D. Zhao, S. Kawashima, P. Stallworth, S. G. Greenbaum and A.-H. A. Park, *Faraday Discuss.*, , DOI:10.1039/d1fd00022e.
- 2 N. Zhang and A. Moment, *ACS Sustain. Chem. Eng.*, , DOI:10.1021/acssuschemeng.2c04241.
